# Supplementary material for: Effectiveness of treat-to-target cholesterol-lowering interventions on cardiovascular disease and all-cause mortality risk in the community-dwelling population: a target trial emulation
Source: PubMed Central journal article supplement (PMC11568141; doi:10.1038/s41467-024-54078-4), 2024-11-15

Supplementary information of  
**“Effectiveness of treat-to-target cholesterol-lowering interventions on  
cardiovascular disease and all-cause mortality risk in the community-dwelling  
population: a target trial emulation”**

Zhao Yang, Qiuju Deng, Yongchen Hao, Na Yang, Lizhen Han, Pingping Jia, Pan  
Zhou, Yiming Hao, Ziyu Wang, Wenlang Zhao, Yue Qi, Jing Liu

**Contents**

|                                                                                                                                                                                                                                                                                                                                                                                                                                                                                                 |    |
|-------------------------------------------------------------------------------------------------------------------------------------------------------------------------------------------------------------------------------------------------------------------------------------------------------------------------------------------------------------------------------------------------------------------------------------------------------------------------------------------------|----|
| <b>Supplementary Tables</b> .....                                                                                                                                                                                                                                                                                                                                                                                                                                                               | 2  |
| <b>Supplementary Table 1.</b> Covariates used to model the risk of developing cardiovascular disease, all-cause mortality, and atherosclerotic cardiovascular disease.....                                                                                                                                                                                                                                                                                                                      | 2  |
| <b>Supplementary Table 2.</b> Estimated parametric g-formula risk (%), risk difference (RD, %), and restricted mean event-free based number needed to treat (NNT) to prevent one cardiovascular disease, all-cause mortality, and atherosclerotic cardiovascular disease under natural course and treat-to-target interventions recommended by the 2020 Chinese Society of Cardiology (unless stated) after 29 years of follow-up from the Chinese Multi-provincial Cohort Study 1992-2020..... | 4  |
| <b>Supplementary Table 3.</b> Estimated risk ratio (RR), restricted mean event-free time (RMET, years), and cumulative percentage of intervention under treat-to-target interventions recommended by the 2020 Chinese Society of Cardiovascular compared to the natural course of no interventions after 29-year follow-up from the Chinese Multi-provincial Cohort Study 1992-2020 <i>via</i> the parametric g-formula.....                                                                    | 8  |
| <b>Supplementary Table 4.</b> Estimated parametric g-formula risk (%), risk difference (RD, %), and restricted mean event-free based number needed to treat (NNT) to prevent one cardiovascular disease, all-cause mortality, and atherosclerotic cardiovascular disease under natural course and feasible interventions (unless stated) after 29 years of follow-up from the Chinese Multi-provincial Cohort Study 1992-2020.....                                                              | 12 |
| <b>Supplementary Table 5.</b> Estimated risk ratio (RR), restricted mean event-free time (RMET, years), and cumulative percentage of intervention under feasible interventions compared to the natural course of no interventions after 29-year follow-up from the Chinese Multi-provincial Cohort Study 1992-2020 <i>via</i> the parametric g-formula.....                                                                                                                                     | 15 |
| <b>Supplementary Figures</b> .....                                                                                                                                                                                                                                                                                                                                                                                                                                                              | 18 |
| <b>Supplementary Figure 1.</b> The observed (red dot) and predicted (blue line) levels of low-density lipoprotein cholesterol (LDL-C) using the generalized linear mixed model after accounting for age, sex, body mass index, hypertension, diabetes, and the use of cholesterol-lowering drugs for nine randomly selected participants (IDs 661, 1842, 1895, 3723, 4857, 4893, 15730, 35986, and 35993).....                                                                                  | 18 |

## Supplementary Tables

**Supplementary Table 1.** Covariates used to model the risk of developing cardiovascular disease, all-cause mortality, and atherosclerotic cardiovascular disease

| Covariates                                  | Years assessed                     | As outcomes                  | Functional form as covariates |
|---------------------------------------------|------------------------------------|------------------------------|-------------------------------|
| <b>Time fixed covariates</b>                |                                    |                              |                               |
| Age at baseline                             | 1992                               | Not predicted                | Linear                        |
| Sex                                         | 1992                               | Not predicted                | 2 categories                  |
| Attained education                          | 1992                               | Not predicted                | 2 categories                  |
| Occupation                                  | 1992                               | Not predicted                | 2 categories                  |
| <b>Time-varying covariates <sup>†</sup></b> |                                    |                              |                               |
| Smoking status                              | 1992 to 2020 annually <sup>†</sup> | Logistic                     | 2 categories                  |
| Body mass index                             | 1992 to 2020 annually              | Linear                       | Linear                        |
| Systolic blood pressure                     | 1992 to 2020 annually              | Linear                       | Linear                        |
| Total cholesterol                           | 1992 to 2020 annually              | Linear                       | Linear                        |
| Low-density lipoprotein cholesterol         | 1992 to 2020 annually              | Linear                       | Linear                        |
| Triglyceridemic                             | 1992 to 2020 annually              | Linear, zero-inflated normal | Linear                        |
| Non-HDL-C                                   | 1992 to 2020 annually              | Linear                       | Linear                        |

|                                      |                       |          |                                     |
|--------------------------------------|-----------------------|----------|-------------------------------------|
| Diabetes                             | 1992 to 2020 annually | Logistic | 2 categories                        |
| Cardiovascular risk stratification † | 1992 to 2020 annually | Logistic | 3 categories with 2 dummy variables |
| Antihypertensive drug                | 1992 to 2020 annually | Logistic | 2 categories                        |
| Cholesterol-lowering drugs           | 1992 to 2020 annually | Logistic | 2 categories                        |
| Discrete follow-up period index      | -                     | -        | Cubic polynomial function           |

**Note:** †All time-varying covariates were collected during 1992, 2002, 2007, and 2012 visits and were imputed for 1992-2001, 2003-2006, 2008-2011, and 2013-2020 annually using the last observation carried forward.

‡ The cardiovascular risk stratification was assessed following the ASCVD and CVD risk algorithms recommended by the Chinese guideline for the primary prevention of cardiovascular disease, in which the 10-year risk stratification of total cardiovascular risk is the same as the atherosclerotic cardiovascular disease in most cases. Briefly, a 3-step evaluation procedure was employed: (1) participants with diabetes (aged  $\geq 40$  years) or LDL-C  $\geq 4.9$  mmol/L (or total cholesterol [TC]  $\geq 7.2$  mmol/L) were directly classified at high risk; (2) participants who do not meet procedure (1), sex-specific 10-year ASCVD risk assessment algorithms, including LDL-C or TC levels, hypertension, smoking status, HDL-C, and age  $\geq 45/55$  years (male/female), were used based on which 10-year ASCVD risk  $< 5\%$ ,  $5\% - 9\%$ , and  $\geq 10\%$  were defined as low, intermediate, and high risk, respectively; (3) for those intermediate-risk participants aged  $< 55$  years, the lifetime risk of cardiovascular disease were assessed, in which participants with  $\geq 2$  following risk factors are defined at high risk: a) systolic blood pressure  $\geq 160$  mmHg or diastolic blood pressure  $\geq 100$  mmHg; b) non-HDL-C  $\geq 5.2$  mmol/L (200 mg/dL); c) HDL-C  $< 1.0$  mmol/L (40 mg/dL); d) body mass index (BMI)  $\geq 28$  kg/m<sup>2</sup>; and e) smoking.

**Supplementary Table 2.** Estimated parametric g-formula risk (%), risk difference (RD, %), and restricted mean event-free based number needed to treat (NNT) to prevent one cardiovascular disease, all-cause mortality, and atherosclerotic cardiovascular disease under natural course and treat-to-target interventions recommended by the 2020 Chinese Society of Cardiology (unless stated) after 29 years of follow-up from the Chinese Multi-provincial Cohort Study 1992-2020

| Interventions                          | Cardiovascular disease |                        |     | All-cause mortality    |                        |     | Atherosclerotic cardiovascular disease |                        |     |
|----------------------------------------|------------------------|------------------------|-----|------------------------|------------------------|-----|----------------------------------------|------------------------|-----|
|                                        | Risk<br>(%, 95% CI)    | RD<br>(%, 95% CI)      | NNT | Risk<br>(%, 95% CI)    | RD<br>(%, 95% CI)      | NNT | Risk<br>(%, 95% CI)                    | RD<br>(%, 95% CI)      | NNT |
| <b>Natural course</b>                  | 18.6<br>(17.7 to 19.9) | Reference              | -   | 25.6<br>(24.7 to 27.4) | Reference              | -   | 17.7<br>(16.9 to 19.0)                 | Reference              | -   |
| <b>Treat-to-target interventions †</b> | 16.3<br>(15.4 to 18.3) | -2.3<br>(-3.4 to -0.8) | 115 | 22.7<br>(21.8 to 25.2) | -3.0<br>(-4.3 to -1.8) | 95  | 15.1<br>(14.2 to 17.2)                 | -2.6<br>(-3.5 to -1.2) | 104 |
| <b>Subgroup analyses</b>               |                        |                        |     |                        |                        |     |                                        |                        |     |
| Sex                                    |                        |                        |     |                        |                        |     |                                        |                        |     |
| Women                                  | 14.4<br>(11.2 to 17.1) | -2.5<br>(-5.2 to 0.0)  | 112 | 19.5<br>(15.2 to 22.9) | -2.9<br>(-6.3 to 0.2)  | 102 | 13.2<br>(10.2 to 15.7)                 | -2.9<br>(-5.4 to -0.0) | 99  |
| Men                                    | 19.2<br>(16.6 to 22.6) | -0.8<br>(-3.3 to 2.3)  | 336 | 28.9<br>(25.5 to 32.6) | -1.6<br>(-4.4 to 1.2)  | 166 | 18.1<br>(15.5 to 21.4)                 | -1.0<br>(-3.6 to 1.8)  | 247 |
| Body mass index (kg/m <sup>2</sup> )   |                        |                        |     |                        |                        |     |                                        |                        |     |

|                                    |                        |                        |     |                        |                        |     |                        |                        |     |
|------------------------------------|------------------------|------------------------|-----|------------------------|------------------------|-----|------------------------|------------------------|-----|
| <24                                | 12.1<br>(10.0 to 15.2) | -2.9<br>(-5.2 to 0.5)  | 91  | 17.6<br>(14.2 to 21.2) | -4.6<br>(-7.8 to -1.0) | 62  | 11.6<br>(9.7 to 14.8)  | -2.6<br>(-4.9 to 1.0)  | 99  |
| ≥24                                | 22.5<br>(19.4 to 25.0) | -1.0<br>(-4.4 to 1.5)  | 252 | 30.0<br>(25.9 to 34.1) | -0.7<br>(-3.5 to 3.5)  | 367 | 20.5<br>(17.7 to 22.9) | -2.0<br>(-5.1 to 0.2)  | 134 |
| <b>Smoking status</b>              |                        |                        |     |                        |                        |     |                        |                        |     |
| Yes                                | 20.8<br>(17.6 to 27.3) | -3.5<br>(-6.0 to 1.0)  | 75  | 32.5<br>(26.1 to 41.6) | -3.0<br>(-8.2 to 2.7)  | 88  | 19.9<br>(16.7 to 25.6) | -3.7<br>(-5.9 to 0.4)  | 73  |
| No                                 | 16.3<br>(13.9 to 19.3) | -1.0<br>(-2.8 to 1.6)  | 271 | 21.4<br>(18.6 to 24.2) | -2.0<br>(-4.5 to 0.6)  | 139 | 15.2<br>(12.9 to 18.3) | -1.3<br>(-3.2 to 1.4)  | 211 |
| <b>Antihypertensive medication</b> |                        |                        |     |                        |                        |     |                        |                        |     |
| Yes                                | 35.7<br>(26.2 to 42.0) | 2.8<br>(-2.5 to 10.0)  | -58 | 48.3<br>(36.5 to 56.8) | 6.1<br>(1.6 to 12.8)   | -31 | 34.1<br>(24.8 to 39.7) | 2.0<br>(-3.5 to 9.0)   | -76 |
| No                                 | 16.1<br>(14.0 to 19.0) | -2.1<br>(-3.5 to 0.6)  | 129 | 21.5<br>(19.0 to 24.4) | -3.7<br>(-5.7 to -1.4) | 77  | 14.9<br>(13.2 to 17.5) | -2.4<br>(-3.8 to 0.1)  | 116 |
| <b>Sensitivity analyses</b>        |                        |                        |     |                        |                        |     |                        |                        |     |
| Reordering time-varying variables  | 16.3<br>(15.4 to 18.3) | -2.3<br>(-3.4 to -0.8) | 116 | 22.7<br>(21.8 to 25.2) | -3.0<br>(-4.3 to -1.8) | 93  | 15.1<br>(14.2 to 17.1) | -2.6<br>(-3.5 to -1.2) | 104 |

|                                  |                        |                        |     |                        |                        |     |                        |                        |     |
|----------------------------------|------------------------|------------------------|-----|------------------------|------------------------|-----|------------------------|------------------------|-----|
| Adherence rate of 70%            | 16.5<br>(15.7 to 18.6) | -2.0<br>(-3.0 to -0.6) | 131 | 22.9<br>(22.2 to 25.4) | -2.7<br>(-4.0 to -1.6) | 104 | 15.4<br>(14.5 to 17.4) | -2.3<br>(-3.1 to -1.0) | 118 |
| Adherence rate of 60%            | 16.7<br>(15.9 to 18.6) | -1.9<br>(-2.8 to -0.5) | 142 | 23.0<br>(22.3 to 25.5) | -2.6<br>(-3.9 to -1.5) | 110 | 15.6<br>(14.7 to 17.5) | -2.2<br>(-2.9 to -0.8) | 127 |
| Adherence rate of 50%            | 16.8<br>(16.0 to 18.8) | -1.7<br>(-2.6 to -0.4) | 155 | 23.2<br>(22.5 to 25.5) | -2.4<br>(-3.7 to -1.4) | 117 | 15.8<br>(14.8 to 17.6) | -2.0<br>(-2.7 to -0.7) | 139 |
| Adherence rate of 40%            | 17.0<br>(16.2 to 18.9) | -1.5<br>(-2.3 to -0.3) | 175 | 23.4<br>(22.6 to 25.7) | -2.3<br>(-3.5 to -1.3) | 128 | 16.0<br>(15.0 to 17.8) | -1.8<br>(-2.5 to -0.6) | 157 |
| Adherence rate of 30%            | 17.3<br>(16.4 to 19.1) | -1.3<br>(-2.0 to -0.1) | 210 | 23.6<br>(22.8 to 25.8) | -2.0<br>(-3.1 to -1.2) | 145 | 16.2<br>(15.3 to 18.0) | -1.5<br>(-2.2 to -0.4) | 188 |
| Adherence rate of 20%            | 17.6<br>(16.7 to 19.3) | -1.0<br>(-1.7 to 0.0)  | 279 | 24.0<br>(23.1 to 26.0) | -1.7<br>(-2.7 to -0.9) | 179 | 16.6<br>(15.7 to 18.2) | -1.1<br>(-1.8 to -0.2) | 250 |
| <b>Positive control analyses</b> |                        |                        |     |                        |                        |     |                        |                        |     |
| Per 1 mmol/L LDL-C reduction     | 15.5<br>(12.9 to 18.2) | -3.1<br>(-6.1 to -0.9) | 79  | 21.2<br>(17.9 to 24.8) | -4.5<br>(-8.2 to -2.3) | 58  | 13.8<br>(11.4 to 16.5) | -3.9<br>(-6.7 to -1.8) | 65  |
| Statin therapies ‡               | 19.0<br>(14.8 to 22.8) | -2.4<br>(-5.5 to 1.2)  | 112 | 23.7<br>(19.4 to 27.4) | -4.8<br>(-7.8 to -0.6) | 57  | 17.6<br>(13.8 to 20.8) | -3.0<br>(-5.9 to 0.3)  | 92  |

**Note:** <sup>†</sup> Treat-to-target cholesterol-lowering intervention is based on cholesterol-lowering targets recommended by the Chinese Society of Cardiology in 2020 on LDL-C and non-HDL-C levels, i.e., for participants with diabetes at high cardiovascular risk, lower the LDL-C to <1.8 mmol/L (70 mg/dL, i.e., a fixed level drawn from a uniform distribution with a upper bound of 1.8 mmol/L) or LDL-C reduction to >50% from baseline whichever is the lowest and non-HDL-C to <2.6 mmol/L (100 mg/dL, i.e., a fixed level drawn from a uniform distribution with a upper bound of 2.6 mmol/L); for participants without diabetes who are at moderate-to-high cardiovascular risk lower the LDL-C to <2.6 mmol/L (100 mg/dL, i.e., a fixed level drawn from a uniform distribution with a upper bound of 2.6 mmol/L) and non-HDL-C to <3.4 mmol/L (130 mg/dL, i.e., a fixed level drawn from a uniform distribution with a upper bound of 3.4 mmol/L); for participants at low cardiovascular risk, lower LDL-C to <3.4 mmol/L (130 mg/dL, i.e., a fixed level drawn from a uniform distribution with a upper bound of 3.4 mmol/L) and a non-HDL-C <4.2 mmol/L (160 mg/dL, i.e., a fixed level drawn from a uniform distribution with a upper bound of 4.2 mmol/L).

<sup>‡</sup> The effects of statin therapies are based on the target trial emulation among participants with baseline LDL-C  $\geq$  1.8 mmol/L, in which statin therapies are supposed to reduce LDL-C levels by 40% compared to the baseline LDL-C levels based on previous studies (Brandts *et al. The Lancet Regional Health – Europe* 2023;31:100665; Toth *et al. J Am Heart Assoc* 2022;11:e025551). Consequently, the observed 29-year cumulative risks of cardiovascular disease, all-cause mortality, and atherosclerotic cardiovascular risk were 21.4% (20.1% to 22.6%), 28.5% (26.8% to 29.5%), and 20.6% (19.3% to 21.6%), respectively.

**Supplementary Table 3.** Estimated risk ratio (RR), restricted mean event-free time (RMET, years), and cumulative percentage of intervention under treat-to-target interventions recommended by the 2020 Chinese Society of Cardiovascular compared to the natural course of no interventions after 29-year follow-up from the Chinese Multi-provincial Cohort Study 1992-2020 *via* the parametric g-formula

| Interventions                        | Cardiovascular disease |         |              | All-cause mortality    |         |              | Atherosclerotic cardiovascular disease |         |              |
|--------------------------------------|------------------------|---------|--------------|------------------------|---------|--------------|----------------------------------------|---------|--------------|
|                                      | RR                     | RMET    | Average %    | RR                     | RMET    | Average %    | RR                                     | RMET    | Average %    |
|                                      | (95% CI)               | (years) | intervention | (95% CI)               | (years) | intervention | (95% CI)                               | (years) | intervention |
| Natural course                       | Reference              | 27.00   | -            | Reference              | 26.52   | -            | Reference                              | 27.13   | -            |
| Treat-to-target interventions †      | 0.88<br>(0.82 to 0.96) | 27.23   | 23           | 0.88<br>(0.84 to 0.93) | 26.80   | 23           | 0.85<br>(0.81 to 0.93)                 | 27.39   | 23           |
| <b>Subgroup analyses</b>             |                        |         |              |                        |         |              |                                        |         |              |
| Sex                                  |                        |         |              |                        |         |              |                                        |         |              |
| Women                                | 0.85<br>(0.69 to 1.00) | 27.51   | 25           | 0.87<br>(0.71 to 1.01) | 27.17   | 25           | 0.82<br>(0.66 to 1.00)                 | 27.67   | 25           |
| Men                                  | 0.96<br>(0.84 to 1.12) | 26.74   | 20           | 0.95<br>(0.86 to 1.04) | 26.08   | 20           | 0.95<br>(0.81 to 1.10)                 | 26.91   | 20           |
| Body mass index (kg/m <sup>2</sup> ) |                        |         |              |                        |         |              |                                        |         |              |
| <24                                  | 0.81<br>(0.66 to 1.03) | 27.70   | 23           | 0.79<br>(0.65 to 0.95) | 27.36   | 23           | 0.81<br>(0.67 to 1.07)                 | 27.77   | 23           |



|                                    |                        |       |    |                        |       |    |                        |       |    |
|------------------------------------|------------------------|-------|----|------------------------|-------|----|------------------------|-------|----|
| $\geq 24$                          | 0.96<br>(0.82 to 1.07) | 26.57 | 23 | 0.98<br>(0.88 to 1.12) | 26.03 | 23 | 0.91<br>(0.79 to 1.01) | 26.85 | 23 |
| <b>Smoking status</b>              |                        |       |    |                        |       |    |                        |       |    |
| Yes                                | 0.86<br>(0.75 to 1.04) | 26.72 | 19 | 0.91<br>(0.76 to 1.07) | 25.88 | 19 | 0.84<br>(0.74 to 1.02) | 26.88 | 19 |
| No                                 | 0.94<br>(0.84 to 1.09) | 27.24 | 25 | 0.91<br>(0.81 to 1.02) | 26.91 | 25 | 0.92<br>(0.81 to 1.08) | 27.39 | 25 |
| <b>Antihypertensive medication</b> |                        |       |    |                        |       |    |                        |       |    |
| Yes                                | 1.09<br>(0.93 to 1.32) | 24.32 | 16 | 1.14<br>(1.04 to 1.33) | 23.26 | 16 | 1.06<br>(0.90 to 1.30) | 24.56 | 16 |
| No                                 | 0.88<br>(0.80 to 1.03) | 27.30 | 21 | 0.85<br>(0.78 to 0.95) | 26.97 | 21 | 0.86<br>(0.78 to 1.01) | 27.46 | 21 |
| <b>Sensitivity analyses</b>        |                        |       |    |                        |       |    |                        |       |    |
| Reordering time-varying variables  | 0.88<br>(0.82 to 0.96) | 27.23 | 23 | 0.88<br>(0.84 to 0.93) | 26.80 | 23 | 0.85<br>(0.81 to 0.93) | 27.39 | 23 |
| Adherence rate of 70%              | 0.89<br>(0.84 to 0.97) | 27.20 | 20 | 0.89<br>(0.85 to 0.94) | 26.77 | 20 | 0.87<br>(0.83 to 0.95) | 27.36 | 20 |

|                                  |                        |       |     |                        |       |     |                        |       |     |
|----------------------------------|------------------------|-------|-----|------------------------|-------|-----|------------------------|-------|-----|
| Adherence rate of 60%            | 0.90<br>(0.85 to 0.97) | 27.19 | 19  | 0.90<br>(0.85 to 0.94) | 26.76 | 19  | 0.88<br>(0.84 to 0.95) | 27.34 | 19  |
| Adherence rate of 50%            | 0.91<br>(0.86 to 0.98) | 27.17 | 17  | 0.90<br>(0.86 to 0.95) | 26.74 | 17  | 0.89<br>(0.85 to 0.96) | 27.32 | 17  |
| Adherence rate of 40%            | 0.92<br>(0.88 to 0.98) | 27.15 | 15  | 0.91<br>(0.87 to 0.95) | 26.72 | 15  | 0.90<br>(0.86 to 0.97) | 27.30 | 15  |
| Adherence rate of 30%            | 0.93<br>(0.89 to 0.99) | 27.13 | 12  | 0.92<br>(0.88 to 0.96) | 26.70 | 12  | 0.92<br>(0.88 to 0.98) | 27.27 | 12  |
| Adherence rate of 20%            | 0.95<br>(0.91 to 1.00) | 27.09 | 9   | 0.93<br>(0.90 to 0.96) | 26.67 | 9   | 0.94<br>(0.90 to 0.99) | 27.24 | 9   |
| <b>Positive control analyses</b> |                        |       |     |                        |       |     |                        |       |     |
| Per 1mmol/L LDL-C reduction      | 0.83<br>(0.68 to 0.95) | 27.34 | 100 | 0.83<br>(0.69 to 0.91) | 26.98 | 100 | 0.78<br>(0.63 to 0.90) | 27.55 | 100 |
| Statin therapies ‡               | 0.89<br>(0.74 to 1.06) | 27.00 | 100 | 0.83<br>(0.72 to 0.98) | 26.80 | 100 | 0.86<br>(0.70 to 1.01) | 27.20 | 100 |

**Note:** † Treat-to-target cholesterol-lowering intervention is based on cholesterol-lowering targets recommended by the Chinese Society of Cardiology in 2020 on LDL-C and non-HDL-C levels, i.e., for participants with diabetes at high cardiovascular risk, lower the LDL-C to <1.8 mmol/L (70 mg/dL, i.e., a fixed level drawn from a uniform distribution with a upper bound of 1.8 mmol/L) or LDL-C reduction to >50% from

baseline whichever is the lowest and non-HDL-C to <2.6 mmol/L (100 mg/dL, i.e., a fixed level drawn from a uniform distribution with a upper bound of 2.6 mmol/L); for participants without diabetes who are at moderate-to-high cardiovascular risk lower the LDL-C to <2.6 mmol/L (100 mg/dL, i.e., a fixed level drawn from a uniform distribution with a upper bound of 2.6 mmol/L) and non-HDL-C to <3.4 mmol/L (130 mg/dL, i.e., a fixed level drawn from a uniform distribution with a upper bound of 3.4 mmol/L); for participants at low cardiovascular risk, lower LDL-C to <3.4 mmol/L (130 mg/dL, i.e., a fixed level drawn from a uniform distribution with a upper bound of 3.4 mmol/L) and a non-HDL-C <4.2 mmol/L (160 mg/dL, i.e., a fixed level drawn from a uniform distribution with a upper bound of 4.2 mmol/L).

‡ The effects of statin therapies are based on the target trial emulation among participants with baseline LDL-C  $\geq 1.8$  mmol/L, in which statin therapies are supposed to reduce LDL-C levels by 40% compared to the baseline LDL-C levels based on previous studies (Brandts *et al. The Lancet Regional Health – Europe* 2023;31:100665; Toth *et al. J Am Heart Assoc* 2022;11:e025551). Consequently, the observed 29-year cumulative risks of cardiovascular disease, all-cause mortality, and atherosclerotic cardiovascular risk were 21.4% (20.1% to 22.6%), 28.5% (26.8% to 29.5%), and 20.6% (19.3% to 21.6%), respectively.

**Supplementary Table 4.** Estimated parametric g-formula risk (%), risk difference (RD, %), and restricted mean event-free based number needed to treat (NNT) to prevent one cardiovascular disease, all-cause mortality, and atherosclerotic cardiovascular disease under natural course and feasible interventions (unless stated) after 29 years of follow-up from the Chinese Multi-provincial Cohort Study 1992-2020

| Interventions                             | Cardiovascular disease |                        |     | All-cause mortality    |                        |     | Atherosclerotic cardiovascular disease |                        |     |
|-------------------------------------------|------------------------|------------------------|-----|------------------------|------------------------|-----|----------------------------------------|------------------------|-----|
|                                           | Risk<br>(%, 95% CI)    | RD<br>(%, 95% CI)      | NNT | Risk<br>(%, 95% CI)    | RD<br>(%, 95% CI)      | NNT | Risk<br>(%, 95% CI)                    | RD<br>(%, 95% CI)      | NNT |
| <b>Natural course</b>                     | 18.6<br>(17.7 to 19.9) | Reference              | -   | 25.6<br>(24.7 to 27.4) | Reference              | -   | 17.7<br>(16.9 to 19.0)                 | Reference              | -   |
| <b>Feasible interventions<sup>†</sup></b> | 16.4<br>(15.6 to 18.5) | -2.1<br>(-3.1 to -0.7) | 124 | 22.8<br>(22.0 to 25.3) | -2.8<br>(-4.1 to -1.7) | 100 | 15.3<br>(14.4 to 17.3)                 | -2.4<br>(-3.3 to -1.1) | 112 |
| <b>Subgroup analyses</b>                  |                        |                        |     |                        |                        |     |                                        |                        |     |
| Sex                                       |                        |                        |     |                        |                        |     |                                        |                        |     |
| Women                                     | 14.6<br>(11.4 to 17.2) | -2.3<br>(-4.9 to 0.1)  | 122 | 19.6<br>(15.6 to 23.1) | -2.7<br>(-5.9 to 0.3)  | 109 | 13.4<br>(10.5 to 15.8)                 | -2.7<br>(-5.1 to 0.1)  | 108 |
| Men                                       | 19.3<br>(16.7 to 22.5) | -0.7<br>(-3.2 to 2.2)  | 376 | 29.0<br>(25.6 to 32.6) | -1.5<br>(-4.2 to 1.2)  | 176 | 18.3<br>(15.6 to 21.3)                 | -0.9<br>(-3.5 to 1.7)  | 275 |
| Body mass index (kg/m <sup>2</sup> )      |                        |                        |     |                        |                        |     |                                        |                        |     |

|                                    |                        |                        |     |                        |                        |     |                        |                        |     |
|------------------------------------|------------------------|------------------------|-----|------------------------|------------------------|-----|------------------------|------------------------|-----|
| <24                                | 12.3<br>(10.2 to 15.4) | -2.7<br>(-5.0 to 0.6)  | 98  | 17.8<br>(14.4 to 21.2) | -4.4<br>(-7.5 to -0.9) | 65  | 11.8<br>(9.9 to 14.9)  | -2.5<br>(-4.7 to 1.1)  | 108 |
| ≥24                                | 22.7<br>(19.7 to 25.2) | -0.9<br>(-4.1 to 1.5)  | 312 | 30.2<br>(26.0 to 34.1) | -0.6<br>(-3.3 to 3.5)  | 467 | 20.7<br>(18.0 to 23.2) | -1.7<br>(-4.8 to 0.3)  | 154 |
| <b>Smoking status</b>              |                        |                        |     |                        |                        |     |                        |                        |     |
| Yes                                | 21.0<br>(17.8 to 27.3) | -3.2<br>(-5.7 to 1.0)  | 81  | 32.7<br>(26.5 to 41.6) | -2.9<br>(-7.8 to 2.8)  | 95  | 20.1<br>(16.9 to 25.7) | -3.4<br>(-5.6 to 0.5)  | 79  |
| No                                 | 16.4<br>(14.1 to 19.2) | -0.9<br>(-2.6 to 1.5)  | 306 | 21.5<br>(18.7 to 24.2) | -1.9<br>(-4.3 to 0.6)  | 148 | 15.3<br>(13.1 to 18.2) | -1.2<br>(-3.0 to 1.3)  | 235 |
| <b>Antihypertensive medication</b> |                        |                        |     |                        |                        |     |                        |                        |     |
| Yes                                | 35.8<br>(26.3 to 41.8) | 2.9<br>(-2.2 to 9.3)   | -57 | 48.2<br>(36.3 to 56.4) | 6.0<br>(1.5 to 12.2)   | -31 | 34.3<br>(24.9 to 39.6) | 2.2<br>(-3.1 to 8.4)   | -73 |
| No                                 | 16.3<br>(14.2 to 19.1) | -1.9<br>(-3.2 to 0.7)  | 142 | 21.7<br>(19.2 to 24.5) | -3.5<br>(-5.4 to -1.2) | 82  | 15.1<br>(13.3 to 17.7) | -2.2<br>(-3.5 to 0.2)  | 127 |
| <b>Sensitivity analyses</b>        |                        |                        |     |                        |                        |     |                        |                        |     |
| Reordering time-varying variables  | 16.5<br>(15.6 to 18.5) | -2.1<br>(-3.1 to -0.7) | 127 | 22.8<br>(22.0 to 25.3) | -2.8<br>(-4.1 to -1.7) | 100 | 15.3<br>(14.4 to 17.3) | -2.4<br>(-3.2 to -1.1) | 114 |

**Note:** † Feasible treat-to-target cholesterol-lowering intervention, defined as 80% of eligible participants receiving the intervention at the follow-up examination over the study period, where the treat-to-target cholesterol-lowering intervention is based on cholesterol-lowering targets recommended by the Chinese Society of Cardiology in 2020 on LDL-C and non-HDL-C levels, i.e., for participants with diabetes at high cardiovascular risk, lower the LDL-C to <1.8 mmol/L (70 mg/dL, i.e., a fixed level drawn from a uniform distribution with a upper bound of 1.8 mmol/L) or LDL-C reduction to >50% from baseline whichever is the lowest and non-HDL-C to <2.6 mmol/L (100 mg/dL, i.e., a fixed level drawn from a uniform distribution with a upper bound of 2.6 mmol/L); for participants without diabetes who are at moderate-to-high cardiovascular risk lower the LDL-C to <2.6 mmol/L (100 mg/dL, , i.e., a fixed level drawn from a uniform distribution with a upper bound of 2.6 mmol/L) and non-HDL-C to <3.4 mmol/L (130 mg/dL, i.e., a fixed level drawn from a uniform distribution with a upper bound of 3.4 mmol/L); for participants at low cardiovascular risk, lower LDL-C to <3.4 mmol/L (130 mg/dL, i.e., a fixed level drawn from a uniform distribution with a upper bound of 3.4 mmol/L) and a non-HDL-C <4.2 mmol/L (160 mg/dL, i.e., a fixed level drawn from a uniform distribution with a upper bound of 4.2 mmol/L).

**Supplementary Table 5.** Estimated risk ratio (RR), restricted mean event-free time (RMET, years), and cumulative percentage of intervention under feasible interventions compared to the natural course of no interventions after 29-year follow-up from the Chinese Multi-provincial Cohort Study 1992-2020 *via* the parametric g-formula

| Interventions                        | Cardiovascular disease |         |              | All-cause mortality    |         |              | Atherosclerotic cardiovascular disease |         |              |
|--------------------------------------|------------------------|---------|--------------|------------------------|---------|--------------|----------------------------------------|---------|--------------|
|                                      | RR                     | RMET    | Average %    | RR                     | RMET    | Average %    | RR                                     | RMET    | Average %    |
|                                      | (95% CI)               | (years) | intervention | (95% CI)               | (years) | intervention | (95% CI)                               | (years) | intervention |
| Natural course                       | Reference              | 27.00   | -            | Reference              | 26.52   | -            | Reference                              | 27.13   | -            |
| Feasible interventions †             | 0.88<br>(0.84 to 0.96) | 27.21   | 21           | 0.89<br>(0.84 to 0.94) | 26.78   | 21           | 0.86<br>(0.82 to 0.94)                 | 27.37   | 21           |
| <b>Subgroup analyses</b>             |                        |         |              |                        |         |              |                                        |         |              |
| Sex                                  |                        |         |              |                        |         |              |                                        |         |              |
| Women                                | 0.87<br>(0.70 to 1.01) | 27.49   | 23           | 0.88<br>(0.72 to 1.01) | 27.16   | 23           | 0.83<br>(0.68 to 1.01)                 | 27.64   | 23           |
| Men                                  | 0.97<br>(0.84 to 1.11) | 26.73   | 18           | 0.95<br>(0.86 to 1.04) | 26.07   | 18           | 0.95<br>(0.82 to 1.09)                 | 26.90   | 18           |
| Body mass index (kg/m <sup>2</sup> ) |                        |         |              |                        |         |              |                                        |         |              |
| <24                                  | 0.82<br>(0.67 to 1.04) | 27.68   | 21           | 0.80<br>(0.66 to 0.96) | 27.34   | 21           | 0.83<br>(0.68 to 1.08)                 | 27.74   | 21           |

|                                   |                        |       |    |                        |       |    |                        |       |    |
|-----------------------------------|------------------------|-------|----|------------------------|-------|----|------------------------|-------|----|
| ≥24                               | 0.96<br>(0.83 to 1.07) | 26.55 | 21 | 0.98<br>(0.89 to 1.12) | 26.02 | 21 | 0.92<br>(0.80 to 1.01) | 26.82 | 21 |
| Smoking status                    |                        |       |    |                        |       |    |                        |       |    |
| Yes                               | 0.87<br>(0.76 to 1.04) | 26.70 | 17 | 0.92<br>(0.77 to 1.07) | 25.86 | 17 | 0.85<br>(0.75 to 1.02) | 26.86 | 17 |
| No                                | 0.95<br>(0.85 to 1.09) | 27.23 | 23 | 0.92<br>(0.82 to 1.02) | 26.90 | 23 | 0.93<br>(0.82 to 1.08) | 27.38 | 23 |
| Antihypertensive medication       |                        |       |    |                        |       |    |                        |       |    |
| Yes                               | 1.09<br>(0.94 to 1.30) | 24.32 | 14 | 1.14<br>(1.04 to 1.31) | 23.28 | 14 | 1.07<br>(0.91 to 1.28) | 24.54 | 14 |
| No                                | 0.89<br>(0.82 to 1.04) | 27.28 | 20 | 0.86<br>(0.79 to 0.95) | 26.95 | 20 | 0.87<br>(0.79 to 1.01) | 27.44 | 20 |
| <b>Positive control analyses</b>  |                        |       |    |                        |       |    |                        |       |    |
| Reordering time-varying variables | 0.89<br>(0.84 to 0.96) | 27.21 | 21 | 0.89<br>(0.84 to 0.94) | 26.78 | 21 | 0.87<br>(0.82 to 0.94) | 27.37 | 21 |

**Note:** † Feasible treat-to-target cholesterol-lowering intervention, defined as 80% of eligible participants receiving the intervention at the follow-up examination over the study period, where treat-to-target cholesterol-lowering intervention is based on cholesterol-lowering targets recommended by the Chinese Society of Cardiology in 2020 on LDL-C and non-HDL-C levels, i.e., for participants with diabetes at high



cardiovascular risk, lower the LDL-C to <1.8 mmol/L (70 mg/dL, i.e., a fixed level drawn from a uniform distribution with a upper bound of 1.8 mmol/L) or LDL-C reduction to >50% from baseline whichever is the lowest and non-HDL-C to <2.6 mmol/L (100 mg/dL, i.e., a fixed level drawn from a uniform distribution with a upper bound of 2.6 mmol/L); for participants without diabetes who are at moderate-to-high cardiovascular risk lower the LDL-C to <2.6 mmol/L (100 mg/dL, i.e., a fixed level drawn from a uniform distribution with a upper bound of 2.6 mmol/L) and non-HDL-C to <3.4 mmol/L (130 mg/dL, i.e., a fixed level drawn from a uniform distribution with a upper bound of 3.4 mmol/L); for participants at low cardiovascular risk, lower LDL-C to <3.4 mmol/L (130 mg/dL, i.e., a fixed level drawn from a uniform distribution with a upper bound of 3.4 mmol/L) and a non-HDL-C <4.2 mmol/L (160 mg/dL, i.e., a fixed level drawn from a uniform distribution with a upper bound of 4.2 mmol/L).

## Supplementary Figures

**Supplementary Figure 1.** The observed (red dot) and predicted (blue line) levels of low-density lipoprotein cholesterol (LDL-C) using the generalized linear mixed model after accounting for age, sex, body mass index, hypertension, diabetes, and the use of cholesterol-lowering drugs for nine randomly selected participants (IDs 661, 1842, 1895, 3723, 4857, 4893, 15730, 35986, and 35993)

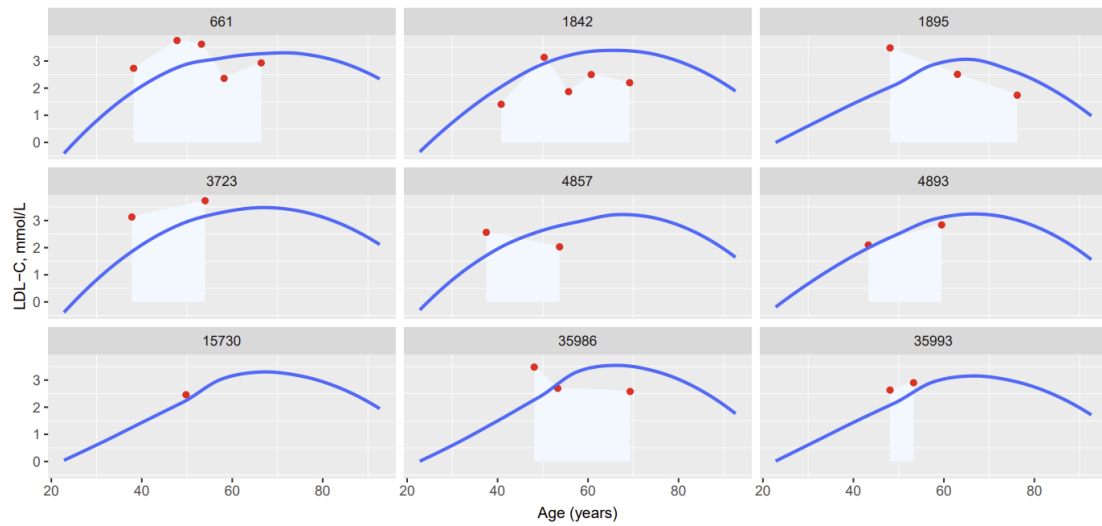

Supplement: 41467_2024_54078_MOESM1_ESM.pdf [file 41467_2024_54078_MOESM1_ESM.pdf]
